## Biochemical properties and *in vitro* biological activities of extracts from seven folk medicinal plants growing wild in southern Tunisia

Hajer Tlili <sup>§1</sup>, Najjaa Hanen<sup>§1</sup>, Abdelkerim Ben Arfa<sup>1</sup>, Mohamed Neffati<sup>1</sup>, Abdelbasset Boubakri<sup>1</sup>, Daniela Buonocore<sup>2</sup>, Maurizia Dossena<sup>2</sup>, Manuela Verri<sup>2</sup>, Enrico Doria<sup>2\*</sup>

<sup>1</sup> *Laboratory of Pastoral Ecosystems and Valorization of Spontaneous Plants and Microorganisms, Institute of Arid Regions (IRA), Medenine, Tunisia*

<sup>2</sup> *Department of Biology and Biotechnology, University of Pavia, Italy*

\*Corresponding author: [enrico.doria@unipv.it](mailto:enrico.doria@unipv.it)

§These authors contributed to this study in equal measure.

### ABSTRACT

Recently, much attention has been paid to the extracts obtained from plant species in order to analyse their biological activities. Due to the climate diversity in Tunisia, the traditional pharmacopoeia consists of a wide arsenal of medicinal plant species since long used in folk medicine, in foods as spices, and in aromatherapy. Although many of these species are nearly facing extinction, only a small proportion of them have been scientifically studied. Therefore, this study explores the biochemical properties of seven spontaneous plants, which were harvested in the arid Tunisian desert: *Marrubium vulgare* L., *Rhus tripartita* (Ucria) D.C., *Thymelaea hirsute* (L.) Endl., *Plantago ovata* Forsk., *Herniaria fontanesii* J. Gay., *Ziziphus lotus* and *Hyoscyamus albus*. Extracts from these plants were found to contain different types of secondary metabolites (polyphenols, flavonoids, condensed tannins, crude saponins, carotenoids and alkaloids) that are involved in important biological activities. The biological activity of the extracts obtained from each Tunisian plant was assessed: first of all, leukaemia and colon cancer cell lines (K-562 and CaCo-2 respectively) were treated with different concentrations of extracts, and then the anti-proliferative activity was observed. The results showed, in particular, how the plant extract from *Rhus tripartita* significantly inhibits cell proliferation, especially on the K-562 tumour cell line. Subsequently, the anti-inflammatory activity was also assessed, and the results showed that *Herniaria fontanesii* and *Marrubium vulgare* possess the highest activity in the group of analysed plants. Finally, the greatest acetylcholinesterase inhibitory effect was exhibited by the extract obtained from *Rhus tripartita*.

37 In conclusion, all the Tunisian plants we analysed were shown to contain a remarkable amount of different  
38 bio-active compounds, thus confirming their involvement in several biological activities. *Rhus tripartita* and  
39 *Ziziphus lotus* were shown to be particularly effective in anti-proliferative activity, while *Herniaria fontanesii*  
40 were shown to have the best anti-inflammatory activity.

41 **Keywords:** Folk medicinal plants, anticancerogenic, anticholinesterase, anti-inflammatory activities, HPLC,  
42 LC-MS analysis.

43

#### 44 INTRODUCTION

45 Nature has been a source of medicinal agents for thousands of years and an impressive number of modern  
46 drugs have been isolated from natural sources, many of them based on their use in traditional medicine. Today  
47 it is estimated that more than two thirds of the world's population relies on plant-derived drugs; some 7,000  
48 medicinal compounds used in the Western pharmacopoeia are derived from plants [1].

49 Recently, much attention has been paid to extracts and biologically active compounds isolated from plant  
50 species in order to analyse their pharmacological activities [2,3].

51 These plants have been used extensively in folk medicine to treat ailments and diseases [4] and are still used  
52 in the rural areas of developing countries [4,5]. In fact, the World Health Organisation (WHO) reported that  
53 around 80% of the world's population still relies on plants as a source for primary health care [6] while  
54 traditional medicine is the only health source available for 60% of the global population [4]. Plants are the  
55 main ingredients of medicines in most traditional systems of healing and have been the source of inspiration  
56 for several major pharmaceutical drugs [7,8]. Medicinal plants are frequently the only form of cancer treatment  
57 for many people in North Africa, either due to low income or spatial distance from the urban treatment centres  
58 [9]. Tunisia has a high diversity of plants with several aromatic plant species traditionally used in folk  
59 medicines, in foods as spices, in massage and in aromatherapy. Among the 2250 species that compose  
60 Tunisia's vascular flora [10], 1630 species are native to the arid and desert part of the country, which is  
61 characterised by low rainfall, high temperature and drying winds [11]. Remarkably, a wide range of plant  
62 species thrive under these conditions, which is of high economic and ecological significance. Due to the  
63 climate diversity in Tunisia, the traditional pharmacopoeia consists of a wide arsenal of medicinal plants.  
64 Although many of these species are nearly facing extinction [12], only a small proportion of them has been

65 scientifically studied [8]. Therefore, this study explores and compares some biochemical and biological  
66 properties of these spontaneous plants, harvested in Tunisian arid lands.

67

## 68 **MATERIALS AND METHODS**

### 69 *Chemicals*

70 All reagents and standards were purchased by Sigma-Aldrich Chemicals Co. (St. Louis, MO) and Merck  
71 (Darmstadt, Germany). Cell culture media and all other supplements were purchased by ATCC® (American  
72 Type Culture Collection) Manassas, VA 20108 USA.

### 73 *Plant material*

74 The ethno-botanical list of the plant material used in this study is reported in table 1. This list also reports the  
75 main uses of each plant in folk medicine. All the plant material was provided by the Institut des Regions Arides  
76 (IRA) in Medenine, Tunisia, where the plants *Marrubium vulgare*, *Herniaria fontanesii*, *Plantago ovata*, *Rhus*  
77 *tripartita*, *Thymelaea hirsuta*, *Ziziphus lotus* and *Hyoscyamus albus* were harvested and authenticated by  
78 botanist Dr. Mohammed Neffati according to the “Flora of Tunisia” catalogue [13]. Voucher specimens were  
79 deposited at the herbarium of the IRA.

80

81

82

83

84

85

86

87

88

89

90

91

92

93

94

95

96

97

98

99

100

101

102

103

104  
105  
106

107  
108  
109

Table 1. The Ethnobotanical data of studied plant species and their main uses in local communities.

| Plant species               | Family                | Local name        | Common name         | Used Part              | Main uses                                                                                                                                                                                       | References           |
|-----------------------------|-----------------------|-------------------|---------------------|------------------------|-------------------------------------------------------------------------------------------------------------------------------------------------------------------------------------------------|----------------------|
| <i>Herniaria fontanesii</i> | Caryophyllaceae       | Gataba            | rupturewort         | Areal part             | Lithiasis or diuresis<br>Treatment of kidney stones                                                                                                                                             | [14]<br>[15]         |
| <i>Hyoschamus albus</i>     | <u>Solanaceae</u>     | El bonj el abyedh | White henbane       | Leaves, seeds          | Sedative and antispasmodic effect<br>Pain affecting urinary tract<br>Treatment of asthma, whooping cough                                                                                        | [7]<br>[16]          |
| <i>Marrubium vulgare</i>    | <u>Lamiaceae</u>      | Oum roubia        | horehound           | Leaves, stems          | Cough and as a choleric in digestive and biliary com-plaints<br>Hypoglycemic activity                                                                                                           | [17]<br>[18]         |
| <i>Plantago ovata</i>       | <u>Plantaginaceae</u> | Aaynem            | Ispaghul            | Leaves, seeds          | Laxative<br>Treatment of hypercholesteremia<br>Antioxidant, anti-inflammatory                                                                                                                   | [19]<br>[20]<br>[21] |
| <i>Rhus tripartita</i>      | <u>Anacardiaceae</u>  | Jedari            | Summaq              | Roots, fruits, leaves  | Diarrhea, colitis, GIT diseases, inflammatory diseases, diabetes, dysentery, hemoptysis, conjunctivitis, animal bites and poisons, hemorrhoids, sexual disease, fever, pain and various cancers | [22] [23]            |
| <i>Thymelaea hirsuta</i>    | Thymelaeaceae         | Mithnan           | Shaggy sparrow-wort | Flowers, leaves, stems | Antiseptic, anti-inflammatory, treatment of hypertension,<br>Anti-melanogenesis<br>hypoglycemic and antidiabetic                                                                                | [24]<br>[25]<br>[26] |
| <i>Ziziphus lotus</i>       | <u>Rhamnaceae</u>     | Sidr, nbeg        | Jujube              | Leaves, fruits         | Anti-inflammatory, analgesic and antiulcerogenic activities, liver complaints, obesity, urinary troubles, diabetes, skin infections, fever, diarrhea, insomnia                                  | [27]<br>[28]         |

110

111 *Plant extraction preparation*

112 The aerial part of each plant was finely powdered and used for the different biochemical assays. Methanol  
113 70% and acetone 70% extracts (0.1 g / 10 ml), macerated for 24h in shaking conditions (50 rpm), were used  
114 to assay the total content of polyphenols, the total content of flavonoids and the total antioxidant activity  
115 (DPPH test and FRAP test). For other assays (biological assays, flavonoids, condensed tannins, carotenoids,  
116 saponins and alkaloids analysis), the extraction method is described in each section.

117 *Total polyphenol content*

118 The total content of phenolics was measured according to the method described by Medoua [29]. For each  
119 sample, methanol and acetone extracts (pH 2.5 using HCl) were centrifuged at 6000 rpm for 10 minutes; the  
120 supernatants were collected and the residue pellets were further washed with 1.5 ml of acetone 70% employing  
121 mechanical agitation (800 rpm, 30 minutes at 4° C) and then centrifuged. The resulting supernatants were  
122 assayed using the Folin-Ciocolteau reagent. Absorbance was measured at 725 nm and results were expressed  
123 in Gallic Acid Equivalents using a gallic acid standard curve.

124 *Total flavonoid content*

125 Total flavonoid content of plant extracts was spectrophotometrically determined by the aluminium chloride  
126 method. Briefly, 150 µl of alcoholic extract, prepared as above, was mixed with 600 µl H<sub>2</sub>O and 45 µl 5%  
127 NaNO<sub>2</sub>. The solution was incubated for 5 minutes at room temperature and then 45 µl 10% AlCl<sub>3</sub> was added  
128 and incubated for one more minute. Finally, 300 µl 1M NaOH and 300 µl H<sub>2</sub>O were added. Absorbance at 510  
129 nm was measured from methanol and acetone extracts. Total flavonoid concentration was determined by a  
130 catechin standard curve. Results were expressed as Catechin Equivalents (CE mg 100 g<sup>-1</sup> FW) [30]. The  
131 samples obtained using this procedure were also assayed by HPLC for quercetin and kaempferol  
132 determination.

133 *Condensed tannin content*

134 Firstly, 0.5 g of each plant powder was mixed with 10 ml of acetone / methanol (containing 1% HCl) solution  
135 (7:3) and shaken (800 rpm) at 60°C for 1 hour in the dark. The samples (in triplicate) were then sonicated and  
136 centrifuged at 6000 rpm for 10 minutes and the supernatant was filtered in new test tubes. An aliquot (0.5 ml)  
137 of each extract was mixed with 3 ml of butanol:HCl (95:5, v/v) solution in screw-capped test tubes and

138 incubated for 60 minutes at 95°C. A red coloration developed and the absorbance was then read at 550 nm.  
139 All results were expressed as mg of standard delphinidin equivalents/g dry material. A linear response was  
140 obtained between 1 µg and 5 µg of delphinidin / ml solution.

#### 141 *Carotenoid content*

142 Sample preparation was performed according to the method used by Kurilich [31] with modifications. Firstly,  
143 0.1 g of dry plant material was added to 25 ml of a chloroform : ethanol : diethyl ether solution (2:1:0.5)  
144 containing BHT. Potassium hydroxide (1 ml, 80% w/v) was added to the mixture for saponification and the  
145 samples were stirred for 1 hour. The solution was then transferred to a separator funnel where 30 ml of a  
146 chloroform : ethanol (2:1) solution was added. After layer separation, combined organic layers were washed  
147 with 50 ml of 5% NaCl and completely dried by rotavapor. The residue was then resuspended with hexane and  
148 spectrophotometrically assayed (Perkin Elmer UV–VIS spectrophotometer) at 450 nm, using β-carotene as  
149 standard. The same samples were then used for HPLC analysis of lutein.

#### 150 *Saponin content*

151 Total saponin content (percent yield) was determined by gravimetric method as described by Kaur [32]. The  
152 methanolic extracts from each plant (1 g in 10 ml) were macerated for 24 hours and then partitioned in a water  
153 and n-butanol (1:1 ratio) solution. This solution was poured into the separator funnel and kept for 2 hours. The  
154 upper n-butanol layer was separated and the solvent was evaporated to obtain crude saponin extract.

#### 155 *Alkaloid content*

156 Total content of alkaloids was determined according to the method described by Biradar [33] with  
157 modifications. Firstly, 5 g of each sample was added to 50 ml of a solution containing 10% acetic acid in  
158 ethanol and mildly stirred for 48 hours. After filtration, the extracts were concentrated to one-quarter of the  
159 original volume and 2 ml of 3% H<sub>2</sub>SO<sub>4</sub> and around 8 ml of water were added to reach pH 2.5. This solution  
160 was transferred to a separator funnel where 10 ml of petroleum ether: diethyl ether (1:1) solution was added.  
161 The bottom phase was collected and added to concentrate ammonium hydroxide solution until precipitation  
162 was complete (pH 8.0). The whole solution was allowed to settle and the precipitated phase was collected and  
163 washed again with ammonium hydroxide and chloroform. This phase, dried first with Na<sub>2</sub>SO<sub>4</sub>, was then  
164 completely dried by rotavapor and weighed to estimate the percentage of alkaloids.

165

166

167 *DPPH test*

168 By means of the widely used 2,2-Diphenyl-1-Picrylhydrazyl (DPPH) test, it is possible to measure the anti-  
169 radical power of the prepared extracts. Different volumes of the samples (from 25 to 75  $\mu$ l) were added to 1  
170 ml of 0.2 mM DPPH solution and to a pure methanol solution for a total volume of 1.5 ml. After incubation  
171 of the samples in the dark for 60 minutes, the absorbance at 517 nm was read against a methanol control and  
172 the results were presented as EC<sub>50</sub> (effective concentration, mg/ml) obtained by plotting the concentration of  
173 the tested sample with the percentage of radical scavenging activity [34].

174 *FRAP test*

175 The reducing power of the extracts was determined according to the method reported by Benzie [35]. Firstly,  
176 2.5 ml of each methanolic and/or acetone extract was added to a reaction solution with 2.5 ml of phosphate  
177 buffer (0.2 M, pH 6.6) and 2.5 ml of 1% potassium ferricyanide K<sub>3</sub>Fe(CN)<sub>6</sub> (freshly prepared). After incubation  
178 at 50°C for 20 minutes, the mixture was centrifuged at 6000 rpm for 10 minutes and then 2.5 ml of  
179 trichloroacetic acid (10%) was added. An aliquot of 2.5 ml of the supernatant was mixed with 2.5 ml distilled  
180 water and 0.5 ml of FeCl<sub>3</sub> (0.1%). The absorbance was measured at 700 nm. The EC<sub>50</sub> value (mg/ml) was  
181 calculated as the effective concentration at which the reducing capacity is 50% less. Ascorbic acid was used  
182 as a reference standard.

183 *Anti-proliferative activity*

184 The anti-proliferative activity of the 70% ethanol extracts (EE), macerated for 24 hours, was assessed by  
185 evaluating the cell viability by MTT assay using 3-(4,5-dim-ethylthiazol-2-yl)-2,5-diphenyl-tetrazolium  
186 bromide reagent or MTT (Sigma-Aldrich®) [36]. In brief, CaCo-2 cells and K-562 cells were maintained as a  
187 culture in Dulbecco's modified Eagle's medium in 96-well plates (2x10<sup>5</sup> cells / well) and incubated at 37°C  
188 with 5% of CO<sub>2</sub> for 24 hours. The medium was then replaced with another medium containing the extracts  
189 from each plant in the final concentration of 100  $\mu$ g/ml. After incubation for 48 hours, this medium was  
190 replaced once again with MTT (5 mg/ml PBS)-containing medium (0.45 mg/ml final concentration). The plates  
191 were then incubated at 37°C for 48 hours. Sodium dodecyl sulphate (SDS; 10% v/v) was then added to each  
192 well (100  $\mu$ l), followed by overnight incubation at 37°C. This reagent was used to solubilise and detect the



193 formazan-crystals and its low concentration was determined by optical density. Absorbance was obtained at  
194 570 nm using a microplate reader (Powerscan HT; Dainippon Pharmaceuticals USA Corporation, NJ, USA).  
195 Data are presented as percentage of cell viability against a control (100% of cell viability) using 100 µg/ml as  
196 concentration of the plant extracts. This concentration was chosen according to the inhibiting concentration  
197 (IC<sub>50</sub>) of each plant extract previously determined (data not shown).

#### 198 *In vitro anti-inflammatory activity*

199 This method was based on inhibition of albumin denaturation [37]. The reaction mixture consists of the  
200 methanolic extract, which is more effective in the extraction of the whole complex of metabolites, of each  
201 tested plant, at a concentration of 100 µg/ml (this concentration was chosen according to the inhibiting  
202 concentration (IC<sub>50</sub>) of each plant extract previously determined (data not shown) and 1% aqueous solution of  
203 bovine albumin fraction. The pH of the reaction mixture was adjusted using a small amount of 1N HCl. The  
204 samples were incubated at 37°C for 20 minutes and then heated at 67°C for 20 minutes. After cooling the  
205 samples, the turbidity was measured spectrophotometrically at 660 nm. The experiment was performed in  
206 triplicate. Acetyl salicylic acid (ASA) in the final concentration of 100 µg/ml was used as a reference drug and  
207 treated similarly for determination of absorbance. Percentage inhibition of protein denaturation was calculated  
208 as follows:

$$209 \quad \% \text{ Inhibition} = \left[ \frac{\text{Abs}_{\text{control}} - \text{Abs}_{\text{sample}}}{\text{Abs}_{\text{control}}} \right] \times 100$$

210

#### 211 *Acetylcholinesterase inhibition*

212 Acetylcholinesterase (AChE) enzymatic activity was measured according to the method described by Khadri  
213 [38] with some modifications. One gram of each plant material was extracted with 10 ml of 70% ethanol. After  
214 24 hours of maceration, the samples were filtrated, dried and the residue was suspended with different volumes  
215 of water (0.0015g / ml). An aliquot of 105 µl of Tris-HCl buffer (50 mM, pH 8), 35 µl of each sample in the  
216 different concentrations and 10 µl acetylcholinesterase solution (0.26 U/ml) were mixed in 96 well plates and  
217 incubated for 15 minutes. Afterwards, 25 µl of AchI (acetylcholine iodide, 0.023 mg/ml) and 142 µl of DTNB  
218 (3 mM) were added. The absorbance was read at 405 nm when the reaction reached the equilibrium (around  
219 10 minutes). A control reaction was carried out using water instead of extract and was considered 100%  
220 activity. Inhibition, in percentage, was calculated in the following way:

221 
$$I (\%) = 100 - (A_{\text{sample}} / A_{\text{control}}) \times 100$$

222 Tests were carried out in triplicate. Extract concentration providing 50% enzymatic inhibition ( $IC_{50}$ ) was  
223 obtained by plotting the inhibition percentage against extract concentrations.

224

#### 225 *HPLC analysis*

226 Chromatographic analysis of lutein was performed using a Shimadzu system equipped with DiscoVery BIO  
227 Wide Pore C18-5 column and a PDA detector (SPD-M20A). The used solvents were (A) methanol: 1M  
228 ammonium acetate 8:2 and (B) methanol:acetone 8:2. The injection volume was 20  $\mu$ l and the flow rate  
229 1ml/min. UV absorbance was settled at 450 nm. The gradient for elution was linear from 0 to 100% B in 20  
230 minutes; after 5 minutes, 100% of A for a further 5 minutes. Finally, a linear flow of 100% A for 5 minutes  
231 was used to equilibrate the column.

#### 232 *LC-ESI-MS analysis*

233 Methanolic extracts (100  $\mu$ g/ml) of plants were filtered through a 0.45  $\mu$ m membrane filter before injection  
234 into the HPLC system. LC-ESI-MS analysis was performed using a LCMS-2020 quadrupole mass  
235 spectrometer (Shimadzu, Kyoto, Japan) equipped with an electrospray ionization source (ESI) and operated in  
236 negative ionization mode. Mass spectrometer was coupled online with an ultra-fast liquid chromatography  
237 system that consisted of a LC-20AD XR binary pump system, SIL-20AC XR autosampler, CTO-20AC column  
238 oven and DGU-20A 3R degasser (Shimadzu, Kyoto, Japan). A DiscoVery BIO Wide Pore C18-5 (Thermo  
239 Electron, Dreieich, Germany) (15 cm x 4.6 mm, 5  $\mu$ m) was applied for analysis. The mobile phase was  
240 composed of A (0.1% formic acid in  $H_2O$ , v/v) and B (0.1% formic acid in methanol, v/v) with a linear gradient  
241 elution: 0-14 min, 10% B; 14-24, 20% B, 27-37, 55 % B, 37-45, 100 % B, 45-50, 10% B. Re-equilibration  
242 duration was 5 minutes between individual runs. The flow rate of the mobile phase was 0.4 ml/min, the column  
243 temperature was maintained at 40°C and the injection volume was 5  $\mu$ l. Spectra were monitored in mode SIM  
244 (Selected Ion Monitoring) and processed using Shimadzu LabSolutions LC-MS software.

#### 245 *Statistical analysis*

246 A descriptive analysis was performed to describe the entire results within each kind of test. Concerning the  
247 anti-proliferative activity, an unimpaired student T-test was used to compare treated cells with control cells.

248 Regarding the biochemical composition analysis, antioxidant activity, the in vitro anti-inflammatory activity  
249 and the acetyl cholinesterase inhibition, a one-way analysis of variance (ANOVA one-way) followed by  
250 DUNCAN test was performed to test possible significant differences among mean values from different  
251 species. The level of significance was set at  $P < 0.05$  for all analyses. Statistical analyses were performed using  
252 SPSS v.20.

253

## 254 **RESULTS AND DISCUSSION**

### 255 *Analysis of secondary metabolites and antioxidant properties*

256 Results about the total polyphenol content (including flavonoids and condensed tannins), the carotenoid  
257 content, the percentage of saponins and alkaloids in all the plant samples, and the antioxidant activity are  
258 presented in tables 2 and 3, respectively.

259

260

261

262

263

264

265

266

267

268

269

270

271

272

273

274

275

276

277

278

279

280

281

282

283

284

285

286

287

288  
289  
290  
291  
292  
293  
294  
295  
296  
297  
298  
299  
300  
301  
302  
303  
304  
305  
306  
307  
308  
309  
310  
311  
312  
313  
314  
315  
316  
317  
318  
319  
320  
321  
322  
323  
324  
325  
326  
327

Table 2. Phytochemical composition of plant extracts.

|                      | <i>Total polyphenols (mg/g)</i> |                             | <i>Total flavonoids (mg/g)</i> |                           | <i>Condensed tannins (mg/ml)</i> | <i>Total carotenoids (mg/ml)</i> | <i>Lutein (mg/ml)</i>     | <i>Crude saponins (%)</i> | <i>Alkaloids (%)</i>    |
|----------------------|---------------------------------|-----------------------------|--------------------------------|---------------------------|----------------------------------|----------------------------------|---------------------------|---------------------------|-------------------------|
|                      | <b>70% methanol</b>             | <b>70% acetone</b>          | <b>70% methanol</b>            | <b>70% acetone</b>        |                                  |                                  |                           |                           |                         |
| <i>H. fontanesii</i> | 27.23 ± 0.012 <sup>d</sup>      | 41.13 ± 0.050 <sup>d</sup>  | 8.26 ± 0.22 <sup>e</sup>       | 13.05 ± 0.26 <sup>d</sup> | 1.31 ± 0.05 <sup>f</sup>         | 0.78 ± 0.09 <sup>e</sup>         | 0.03 ± 0.005 <sup>d</sup> | 0.3 ± 0.03 <sup>f</sup>   | 0.3 ± 0.04 <sup>d</sup> |
| <i>H. albus</i>      | 22.15 ± 0.026 <sup>e</sup>      | 21.16 ± 0.041 <sup>f</sup>  | 21.57 ± 0.44 <sup>b</sup>      | 20.09 ± 0.40 <sup>b</sup> | 2.20 ± 0.12 <sup>e</sup>         | 2.03 ± 0.12 <sup>c</sup>         | 0.19 ± 0.010 <sup>b</sup> | 0.7 ± 0.08 <sup>d</sup>   | 0.4 ± 0.04 <sup>c</sup> |
| <i>M. vulgare</i>    | 18.15 ± 0.006 <sup>d</sup>      | 16.07 ± 0.008 <sup>g</sup>  | 14.46 ± 0.35 <sup>d</sup>      | 12.49 ± 0.29 <sup>d</sup> | 4.38 ± 0.09 <sup>d</sup>         | 3.21 ± 0.18 <sup>a</sup>         | 0.43 ± 0.040 <sup>a</sup> | 0.4 ± 0.03 <sup>e</sup>   | 0.3 ± 0.03 <sup>d</sup> |
| <i>P. ovata</i>      | 23.92 ± 0.021 <sup>e</sup>      | 27.60 ± 0.039 <sup>e</sup>  | 17.63 ± 0.41 <sup>c</sup>      | 16.39 ± 0.26 <sup>c</sup> | 5.13 ± 0.11 <sup>c</sup>         | 2.93 ± 0.15 <sup>b</sup>         | 0.18 ± 0.007 <sup>b</sup> | 0.8 ± 0.05 <sup>c</sup>   | 0.1 ± 0.01 <sup>e</sup> |
| <i>R. tripartita</i> | 91.58 ± 0.049 <sup>a</sup>      | 103.67 ± 0.071 <sup>a</sup> | 14.26 ± 0.61 <sup>d</sup>      | 23.51 ± 0.25 <sup>b</sup> | 9.96 ± 0.22 <sup>a</sup>         | 0.85 ± 0.06 <sup>e</sup>         | 0.04 ± 0.005 <sup>d</sup> | 1.2 ± 0.07 <sup>a</sup>   | 0.4 ± 0.03 <sup>c</sup> |
| <i>T. hirsuta</i>    | 47.25 ± 0.033 <sup>b</sup>      | 50.09 ± 0.051 <sup>b</sup>  | 27.60 ± 0.72 <sup>a</sup>      | 36.83 ± 0.31 <sup>a</sup> | 7.63 ± 0.17 <sup>b</sup>         | 1.25 ± 0.11 <sup>d</sup>         | 0.10 ± 0.006 <sup>c</sup> | 0.4 ± 0.05 <sup>e</sup>   | 1.3 ± 0.06 <sup>a</sup> |
| <i>Z. lotus</i>      | 31.52 ± 0.045 <sup>c</sup>      | 43.02 ± 0.044 <sup>c</sup>  | 12.32 ± 0.31 <sup>c</sup>      | 17.50 ± 0.25 <sup>c</sup> | 2.99 ± 0.11 <sup>e</sup>         | 0.99 ± 0.07 <sup>e</sup>         | 0.03 ± 0.002 <sup>d</sup> | 0.9 ± 0.10 <sup>b</sup>   | 0.5 ± 0.03 <sup>b</sup> |

Data are presented as mean values ± standard deviation (n=3). Statistical analysis: ANOVA test and DUNCAN test. The different letters above the values in the same column indicate significant differences (p<0.05). Values with the same superscript letters in the same column are not significant.

328  
329  
330  
331  
332  
333  
334

Table 3. Antioxidant activity of plant extracts

|                      | <i>DPPH</i> ( $EC_{50}$ mg/ml) |                           | <i>FRAP</i> ( $EC_{50}$ mg/ml) |                           |
|----------------------|--------------------------------|---------------------------|--------------------------------|---------------------------|
|                      | 70% methanol                   | 70% acetone               | 70% methanol                   | 70% acetone               |
| <i>H. fontanesii</i> | 1.30 ± 0.023 <sup>b</sup>      | 1.26 ± 0.025 <sup>b</sup> | 0.19 ± 0.006 <sup>e</sup>      | 0.12 ± 0.004 <sup>d</sup> |
| <i>H. aureus</i>     | 0.15 ± 0.003 <sup>g</sup>      | 0.22 ± 0.001 <sup>e</sup> | 0.32 ± 0.003 <sup>a</sup>      | 0.46 ± 0.042 <sup>b</sup> |
| <i>M. vulgare</i>    | 1.11 ± 0.012 <sup>c</sup>      | 1.66 ± 0.027 <sup>a</sup> | 0.08 ± 0.003 <sup>e</sup>      | 0.06 ± 0.008 <sup>e</sup> |
| <i>P. ovata</i>      | 0.56 ± 0.010 <sup>d</sup>      | 0.48 ± 0.004 <sup>c</sup> | 0.17 ± 0.012 <sup>d</sup>      | 0.20 ± 0.006 <sup>e</sup> |
| <i>R. tripartita</i> | 0.44 ± 0.008 <sup>e</sup>      | 0.30 ± 0.003 <sup>d</sup> | 0.22 ± 0.010 <sup>b</sup>      | 0.75 ± 0.001 <sup>a</sup> |
| <i>T. hirsuta</i>    | 1.90 ± 0.015 <sup>a</sup>      | 0.17 ± 0.001 <sup>f</sup> | 0.11 ± 0.005 <sup>f</sup>      | 0.10 ± 0.010 <sup>d</sup> |
| <i>Z. lotus</i>      | 0.19 ± 0.036 <sup>f</sup>      | 0.11 ± 0.002 <sup>g</sup> | 0.13 ± 0.005 <sup>e</sup>      | 0.18 ± 0.006 <sup>e</sup> |

335  
336  
337  
338

Data are presented as mean values ± Standard deviation (n=3). Statistical analysis: ANOVA test and DUNCAN test (p<0.05). Values with the same superscript letters in the same column are not significant.

339

340

341

342 Antioxidant activity measured by the DPPH test and the FRAP test, in both methanol and acetone extracts,  
343 showed remarkable variability. Considering the results obtained by using both extraction methods, the highest  
344 radical scavenging activity demonstrated by the DPPH test was found in the methanol extract of *Z. lotus*: it  
345 was around 10 times higher than the average value observed in the other plant samples extracted with the same  
346 solvent. The extraction carried out with acetone provided lower  $EC_{50}$  results (hence higher antioxidant activity)  
347 than those registered for the methanol extract, except in *M. vulgare* and in *H. albus*. In particular, in *T. hirsuta*,  
348 the antiradical activity measured in the acetone extract was almost 11 times higher than that observed in the  
349 methanol extract.

350 The FRAP test revealed how the most significant difference in the ferric reducing antioxidant power was  
351 observed in *R. tripartita* where the methanol extract showed an antioxidant activity that was almost 3.5 times  
352 higher than the acetone extract. Regarding total polyphenol content, few significant differences were found  
353 between the two types of solvent extraction. In particular, the acetone extract of *H. fontanesii* showed a  
354 phenolic content that was around 50% higher than the methanol extract. *R. tripartita* presented the highest  
355 value of these secondary metabolites: almost 3.5 times higher than the average registered for the other plants,

356 regardless of the solvent used for extraction. *T. hirsuta* showed the highest content of total flavonoids, both for  
357 methanol and acetone extract. There are not many data available in literature about the plants examined in this  
358 study, so making a comparison of the results we obtained is not easy. Nonetheless, a few papers reported the  
359 amount of phenolics in some of these plants; recently, in a review about the biochemical composition of  
360 different parts of *Z. lotus*, Abdoul-Azize [39] reported around 7 mg/g of phenolics to be present in the leaves,  
361 almost 5 times less than the amount measured in our study. Moreover, in the same review, the tannin content  
362 observed in the leaves was the same that we measured in the samples described in this paper (around 3.0 mg/g).  
363 Conversely, the content of phenolics in the leaves of *T. hirsuta* and *R. tripartitum*, including flavonoids, and  
364 the DPPH values found by Akrouit [40] and Itidel [41] were in line with those measured in our study. When  
365 Alghazeer [42] studied the antioxidant activity of some plants growing in Libya, he found two times higher  
366 the amount of polyphenols in *H. albus* than we found in this study. The total carotenoid content in the Tunisian  
367 plants we analysed was quite variable. *M. vulgare* and *P. ovata* showed the highest content of these pigments  
368 (3.21 mg/g and 2.90 mg/g respectively), while *R. tripartita* presented the lowest value (0.85 mg/g). These data,  
369 presented in Table 2, reflect the lutein content measured in the plant leaves, of which *Marrubium* was found  
370 to contain the highest amount (0.43 mg/g): around 4.5 times higher than the average of the other plants. There  
371 are no available data in literature about the content of lutein or carotenoids in the plants examined in this work,  
372 so the results shown in the present paper represent the first indication of the level of these pigments.  
373 Mass spectrometry analysis (table 4) revealed the presence, in the plant extracts, of a large variation of  
374 flavonoids involved in several biological activities. In particular, *R. tripartita* showed a richer profile of  
375 flavonoids than the other plants we analysed, with a high amount of luteolin-7-o-glucoside and apigenin-7-o-  
376 glucoside, which are both involved in cancer prevention [43]. *Z. lotus* showed around 15 times higher the  
377 amount of rutin, a glycoside of the flavonoid quercetin with a documented anti-inflammatory and anti-  
378 carcinogenic activity [44], than the average value found in the other Tunisian plants. In *H. fontanesii*, high  
379 concentrations were found of catechin, epicatechin and rutin, which are all molecules involved in the  
380 prevention and treatment of chronic diseases in humans such as inflammatory diseases [45]. Finally, *T. hirsuta*  
381 showed the highest amount of the flavonoid kaempferol: more than 10 times higher than the average amount  
382 registered for the other examined plants.  
383

384

385

386

387

388 Table 4. Mass spectrometry analysis of different flavonoids present in the plant alcohol extracts.

| No | Compounds                             | m/z | Rt(min) | <i>H.fontanessii</i> | <i>H.albus</i> | <i>M.vulgare</i> | <i>P.ovata</i> | <i>T.hirsuta</i> | <i>R.tripartita</i> | <i>Z.lotus</i> |
|----|---------------------------------------|-----|---------|----------------------|----------------|------------------|----------------|------------------|---------------------|----------------|
|    |                                       |     |         | Concentration (ppm)  |                |                  |                |                  |                     |                |
| 1  | quinic acid                           | 191 | 2.024   | 54.42                | 39             | 22.08            | 0.850          | 106.81           | 20.805              | 24.61          |
| 2  | Galic acid                            | 169 | 3.870   | 0.908                | -              | 0.131            | -              | -                | -                   | 1.178          |
| 3  | protocatechuic acid                   | 153 | 6.811   | 0.398                | 0.092          | 0.159            | 0.305          | 0.346            | -                   | 0.335          |
| 4  | Catechin (+)                          | 289 | 11.028  | 34.978               | -              | 0.132            | -              | 13.87            | 0.196               | 0.685          |
| 5  | 4-O-caffeoylquinic acid               | 353 | 11.701  | 0.221                | 0.178          | 11.64            | 1.651          | 70.04            | 2.227               | 0.12           |
| 6  | caffeic acid                          | 179 | 14.52   | 0.250                | 0.176          | 3.965            | -              | 0.442            | 3.669               | -              |
| 7  | syringic acid                         | 197 | 16.028  | 0.069                | 0.371          | 0,329            | 0.188          | 0.090            | 0.313               | 0.192          |
| 8  | Epicatechin                           | 289 | 16.245  | 21.51                | -              | -                | -              | 1.415            | -                   | 0.442          |
| 9  | p-coumaric acid                       | 163 | 20.904  | 1.049                | 0.449          | 0.167            | 0.154          | 0.365            | 0.178               | 1.289          |
| 10 | trans ferulic acid                    | 193 | 23.07   | 1.726                | 0.241          | 0.447            | 0.089          | 0.749            | 0.504               | 0.136          |
| 11 | Rutin                                 | 609 | 23.838  | 112.4                | 39.545         | 10.031           | 7.198          | 0.674            | 11.656              | 529.4          |
| 12 | Luteolin-7-o-glucoside                | 447 | 24.604  | -                    | -              | -                | 2.375          | 1.56             | 7.179               | -              |
| 13 | Hyperoside (quercetin-3-o-galactoside | 463 | 24.639  | 2.017                | 11.399         | 0.486            | 1.906          | 0.398            | 0.475               | 15.80          |
| 14 | Naringin                              | 579 | 25.786  | -                    | -              | -                | 2.474          | -                | -                   | -              |
| 15 | Quercetrin (quercetin-3-o-rhamonoside | 447 | 26.579  | -                    | 12.608         | -                | -              | 5.903            | -                   | 6.983          |
| 16 | 4,5-di-O-caffeoyquinic acid           | 515 | 26.732  | -                    | -              | -                | -              | -                | 0.275               | -              |
| 17 | Apigenin-7-o-glucoside                | 431 | 26.901  | -                    | -              | 0.952            | -              | -                | 1.038               | -              |
| 18 | Salviolinic acid                      | 717 | 28.245  | -                    | -              | 0.232            | -              | -                | -                   | -              |
| 19 | Quercetin                             | 301 | 31.895  | 0.106                | -              | -                | 0.064          | -                | 0.020               | 0.278          |
| 20 | trans cinnamic acid                   | 147 | 31.9    | 0.233                | -              | -                | 0.170          | -                | 0.031               | -              |
| 21 | Kaempferol                            | 285 | 31.944  | 0,254                | -              | 0.178            | 0.488          | 3.705            | 0.147               | 0.118          |
| 22 | Silymarin                             | 481 | 33,481  | -                    | -              | 0.751            | -              | -                | 0.869               | -              |
| 23 | Naringenin                            | 271 | 33,882  | 0.074                | -              | 0.233            | -              | 0.222            | 0.240               | 0.043          |
| 24 | Apegenin                              | 269 | 34,531  | 0,030                | -              | 0.952            | 0.358          | 0.716            | 0.354               | 0.035          |
| 25 | Luteolin                              | 285 | 34,943  | -                    | 1,172          | -                | -              | -                | -                   | 0.406          |
| 26 | Acacetin                              | 283 | 40,319  | -                    | -              | 0.164            | -              | 0.145            | 0.220               | -              |

389

390

391

392

393 Data about the content of saponins and alkaloids in the examined aromatic plants are expressed as a % of the  
 394 dry weight and are shown in Table 2. Regarding the content of the glycosides triterpenoids, *R. tripartita*  
 395 showed the highest amount (12 mg/g DW), while in the other plant leaf extracts, the amount of saponins ranged

396 between 0.3% and 0.9%, with a high sampling variance  $\sigma^2$  of 0.09. The saponin content measured in *Z. lotus*  
397 (0.9%) was more than double the amount (0.4%) found by Abdoul-Azize [39], while in *P. ovata*, the  
398 concentration of these compounds (0.8%) was in line with that observed by Mamta [46] which measured a  
399 content of 0.7% in the leaves.

400 The highest alkaloid percentage was registered in *T. hirsuta* (1.3%), while the lowest value was found in *P.*  
401 *ovata* (0.1%); in all the other plants, the values ranged between 0.3 and 0.5%. There are few data available in  
402 literature about the measurement of the total alkaloid content in these plants; the same percentage (0.3)  
403 registered for Marrubium was found by Ohtera *et al.* [47] for the betonicine and stachydrine alkaloids.

#### 404 *Anti-proliferative activity*

405 The cytotoxicity of the seven plant extracts was performed against two human cancer cell lines, CaCo-2 (colon  
406 carcinoma) and K-562 (myelogenous leukemia). Results revealed a concentration and species-dependent  
407 cytotoxic effect of the examined extracts; the cell viability of the two cancer cell lines, expressed as a  
408 percentage, is shown in Figure 1. Out of the seven plant extracts, *Rhus tripartita* was found to be the most  
409 effective in inhibiting cell proliferation (IC<sub>50</sub> value < 50 µg/ml), in particular of the K-562 leukaemia tumour  
410 cell line. These data confirmed the results obtained by Najjaa *et al.* [8], who found that *Rhus tripartita*  
411 displayed the strongest anti-cancer activity against colon adenocarcinoma cell lines (DLD-1). In fact, data  
412 presented in this paper showed that *Rhus tripartita* extracts, perhaps due to the high variability and  
413 concentration of polyphenols, possess the highest growth inhibitory and cytotoxic effects on carcinoma and  
414 leukaemia cell lines.

415

416 **Fig 1. Cell viability (%).** Anti-proliferative activities of the different ethanol extracts (100 µg/ml) of Tunisian  
417 medicinal plants tested on two neoplastic cell lines (K-562 and CaCo-2).

418 Data are presented as mean values ± standard deviation (n=3). Statistical analysis: unpaired STUDENT T-test.  
419 The results were statistically significant compared with the untreated cells (control) (p <0.001).

420

#### 421 *In-vitro anti-inflammatory activity*

422 Denaturation of proteins, with the consequent loss of their biological activity, is a well-documented cause of  
423 inflammation [48]; therefore, agents that cause the prevention of precipitation of denatured protein aggregates  
424 and protein condensation are considered useful in disease treatment such as rheumatic disorders, cataracts and



425 Alzheimer's disease [49, 50]. As part of the investigation into the mechanism of anti-inflammatory activity,  
426 the ability of the examined plant extracts to inhibit protein denaturation was studied and results are presented  
427 in Figure 2.

428 No remarkable differences were registered among the examined plant extracts; except for *Z. lotus*, which  
429 presented a slightly lower percentage of inhibition of protein denaturation than the other aromatic plants, a  
430 concentration of 100 µg/ml of plant extract was shown to be very effective in inhibiting heat induced albumin  
431 denaturation in a range between 59.94% and 67.10%. Acetylsalicylic acid (ASA), used as a control reference,  
432 showed 61.21% inhibition.

433 **Fig 2. Inhibition of protein denaturation (%).** Anti-inflammatory activity of the different methanolic  
434 extracts (100 µg/ml) of the tested Tunisian medicinal plants. Data are presented as mean values ± standard  
435 deviation (n=3). Statistical analysis: ANOVA test and DUNCAN test.

436 <sup>a,b,c</sup> Different letters above the bars indicate significant differences (p<0.05).

437

#### 438 *Acetylcholinesterase inhibition*

439 Aromatic plant extracts were tested to determine their ability to inhibit acetylcholinesterase activity. This  
440 enzyme (AChE) regulates hydrolysis of acetylcholine (ACh) in the brain, so it is an important target for the  
441 treatment of Alzheimer's disease (AD) [51], a feature of which is ACh deficiency.

442 Results, expressed as IC<sub>50</sub> values and presented in Figure 3, showed that, except for *H. albus*, all the plants are  
443 able to inhibit AChE activity by 50%, at a concentration less than or equal to 1 mg/ml. This inhibitory activity  
444 could be attributed to the chemical compositions of plants mainly containing flavonoids, phenolic acids and  
445 tannins, as well as, to the possible synergistic interaction between these components [52, 53]. The results  
446 obtained in this work are in concordance with those found by Orhan et al. [54], who used acetone extracts  
447 from several aromatic plants, and in the range of the values reported for other Lamiaceae and Fumariaceae  
448 species [55, 56].

449

450 **Fig 3. IC<sub>50</sub> (mg/ml).** Acetylcholinesterase activity inhibition of ethanol extracts of the tested Tunisian  
451 medicinal plants. Data are presented as mean values ± standard deviation (n=3). Statistical analysis: ANOVA test and  
452 DUNCAN test.

453 <sup>a,b,c</sup> Different letters above the bars indicate significant differences (p<0.05).

454

455

## 456 CONCLUSIONS

457 This work offers an overview of some biochemical and biological properties of seven aromatic plants,  
458 traditionally used in the Tunisian region in folk medicine. Both biochemical and biological tests were  
459 performed to provide a complete framework for each plant examined in this study. All the tested Tunisian  
460 plants showed a remarkable presence of secondary metabolites, involved in several biological activities. In  
461 particular, *Rhus tripartita* has a high content of polyphenols and saponins, responsible for the significant anti-  
462 proliferative activity. Due to the abundance of bioactive metabolites, all the extracts obtained by the plants  
463 were shown to be able to inhibit AChE activity by 50%, at a concentration less than or equal to 1 mg/ml;  
464 moreover, these extracts were shown to be efficient, with the exception of *Z. lotus*, in the prevention of  
465 precipitation of the denatured protein aggregates involved in inflammation. In conclusion, all the data confirm  
466 the importance of the Tunisian local vegetation as a potential source of various bioactive phytochemical  
467 compounds; the investigation is based on the need for different biological agents from natural sources with  
468 potent activity and lesser side effects as substitutes for chemical therapeutics.

469

#### 470 *Acknowledgements*

471 This work was conducted within an Agreement between the University of Pavia, Italy and the Range Ecology  
472 Laboratory, Arid Lands Institute of Medenine, Tunisia. The authors thank Prof. Mohamed Neffati, an expert  
473 in the field of the ethnobotanical value of the spontaneous plants of the Tunisian arid zones, for botanical  
474 identification.

#### 475 Funding

476 This research did not receive any specific grants from funding agencies in the public, commercial, or non-  
477 profit sectors.

478

479

#### 480 **References**

- 481 1. Doit C, Barre J, Cohen R, Bonacorsi S, Bourrillon A, Bingen E. Bactericidal activity against  
482 intermediately cephalosporin resistant *Streptococcus pneumoniae* in cerebrospinal fluid of children  
483 with bacterial meningitis treated with high doses of cefotaxime and vancomycin. *Antimicrob. Agents*  
484 *Chemother.* 1997; 41: 2050-2052.

- 485 2. Essawi T, Srour M. Screening of some Palestinian medicinal plants for antibacterial activity. *J*  
486 *Ethnopharmacol.* 2000; 70: 343-349.
- 487 3. Mehtab P, Ali MM, Mahbbob A, Faheem A, Pedro SPS, Manuela RS. Two new phenolic compounds  
488 from *Ficus rumphii* and their antiproliferative activity. *J Nat Prod Res.* 2014; 28: 646-652.
- 489 4. El-Seedi HR, Burman R, Mansour A, Turki Z, Boulos L, Gullbo, J. The traditional medical uses and  
490 cytotoxic activities of sixtyone Egyptian plants: discovery of an active cardiac glycoside from *Urginea*  
491 *maritima*. *J. Ethnopharmacol.* 2013; 145: 746–757.
- 492 5. Ouelbani, R, Bensari, S, Mouas, TN, and Khelifi, D. Ethnobotanical investigations on plants used in  
493 folk medicine in the regions of Constantine and Mila (North-East of Algeria). *J. Ethnopharmacol.*  
494 2016; 194: 196–218.
- 495 6. Cordell G. Changing strategies in natural products chemistry. *Phytochemistry.* 1995; 40: 1585–1612
- 496 7. Chevallier A. The encyclopedia of medicinal plants. Dorling Kindersley 1996; London
- 497 8. Najjaa H, Arfa A, Ben Máthé Á, & Neffati M. Medicinal and Aromatic Plants of the World – Africa  
498 2017; 3.
- 499 9. Kabbaj FZ, Meddah B, Cherrah Y, El M, and Faouzi A. Ethnopharmacological profile of traditional  
500 plants used in Morocco by cancer patients as herbal therapeutics. *Phytopharmacology.* 2012; 2: 243–  
501 256
- 502 10. Marrif HI, Ali BH, Hassan KM. Some pharmacological studies on *Artemisia herba-alba* (Asso.) in  
503 rabbits and mice. *J Ethnopharmacol.* 1995; 49(1): 51–55
- 504 11. Le Houerou HN. La vegetation de la Tunisie steppique (avec references au Maroc, en Algérie et la  
505 Libye). *Ann Inst Nat Rech Agric Tunisie.* 1969; 42; 642p
- 506 12. Ziyat A, Legssyer H, Mekhfi H, Dassouli A, Serhouchni M, Benjelloun W. Phytotherapy of  
507 hypertension and diabetes in oriental Morocco. *J Ethnopharmacol.* 1997; 58: 45–54
- 508 13. Cuenod A. Flore analytique et synoptique de la Tunisie: Cryptogames vasculaires, Gymnospermes et  
509 monocotylédones. 1954. Imprimerie S.E.F.A.N. Tunisie, 287 pp.
- 510 14. Nait Mbark AZ, Charouf V, Wray M, Nimitz T. Schopke. “Monodesmosidic saponins from *Herniaria*  
511 *hirsuta*,” *Die Pharmazie,* 2000; 55(9): 690–692.

- 512 15. Rhiouani H, El-Hilaly J, Israili HZ, Lyoussi B. Acute and sub-chronic toxicity of an aqueous extract  
513 of the leaves of *Herniaria glabra* in rodents J. Ethnopharm. 2008; 118: 378–386.  
514 DOI: 10.1016/j.jep.2008.05.009
- 515 16. Bown. D. Encyclopaedia of Herbs and their Uses. Dorling Kindersley, London. (1995)
- 516 17. Zaabat N, Hay AE, Michalet S, Darbour N, Bayet C, Skandrani I. Antioxidant and antigeno- toxic  
517 properties of compounds isolated from *Marrubium deserti* de Noe. Food Chem Toxicol. 2011; 49(12):  
518 3328–3335.
- 519 18. Roman RR, Aharcon AF, Lara LA, Flores SJL. Hypoglycemic effect of plants used in Mexico as  
520 antidiabetics. Arch. Med. Res. 1992; 23(1): 59-64.
- 521 19. Sourì E, Amin G, Farsam H, Arazandeh B, Tehrani M. Screening of antioxidant activity and phenolic  
522 content of 24 medicinal plant extracts, DARU. 2008; 16(2) 83-87.
- 523 20. Pourmorad F, Hosseinimehr SJ, Shahabimajd N. Antioxidant activity, phenol and flavonoid contents  
524 of some selected Iranian medicinal plants, African Journal of Biotechnology. 2006; 5(11): 1142-1145.
- 525 21. Talukder P, Talapatra S, Ghoshal N, Sen Raychaudhuri S. Antioxidant activity and high-performance  
526 liquid chromatographic analysis of phenolic compounds during in vitro callus culture of *Plantago*  
527 *ovata* Forsk. and effect of exogenous additives on accumulation of phenolic compounds. Journal of  
528 the Science of Food and Agriculture. 2016; 96(1): 232–244.
- 529 22. Wu T, McCallum JL, Wang S, Liu R, Zhu H, Tsao R. Evaluation of antioxidant activities and chemical  
530 characterization of staghorn sumac fruit (*Rhus hirta* L.). Food Chemistry. 2013; 138:1333-1340.
- 531 23. Giancarlo S, Rosa ML, Nadjafi F, Francesco M. Hypoglycaemic activity of two spices extracts: *Rhus*  
532 *coriaria* L. and *Bunium persicum* Boiss. Natural Product Research. 2006; 20: 882-886.
- 533 24. Le Floc'h E. Contribution à une étude ethnobotanique de la Flore Tunisienne. Pub. Sci. Tunis.  
534 Programme Flore et végétation Tunisiennes. 1983
- 535 25. Kawano M, Matsuyama K, Miyamae Y, Shinmoto H, Kchouk ME, Morio T, Shigemori H, Isoda H.  
536 Antimelanogenesis effect of Tunisian herb *Thymelaea hirsuta* extract on B16 murine melanoma cells.  
537 Experimental Dermatology. 2007; 16(12): 977–984.
- 538 26. El Amrani F, Rhallab A, Alaoui T, El Badaoui K, Chakir S. Hypoglycaemic effect of *T. hirsuta* in  
539 normal and streptozotocin-induced diabetic rats. J. Medit. Plant. Res. 2009; 3: 625-629.

- 540 27. Borgi W, Recio MC, Ríos JL, Chouchane N. Anti-inflammatory and analgesic activities of flavonoid  
541 and saponins fractions from *Zizyphus lotus* (L.) Lam. *South African Journal of Botany*. 2004; 74:320–  
542 324
- 543 28. Adzu B., Amos S., Amizan MB., Gamaniel K., 2003. Evaluation of the anti-diarrheal effects of  
544 *Zizyphus spina-christi* stem bark in rats. *Acta Tropica*.7, 245–50.
- 545 29. Medoua, G.M., Egal, A.A., Oldewage-Theron, W.H., 2009. Nutritional value and antioxidant capacity  
546 of lunch meals consumed by elderly people of Sharpeville, South Africa. *Food Chemistry*. 115, 260-  
547 264.
- 548 30. Lola-Luz T, Hennequart F, Gaffney M. Effect on yield, total phenolic, total flavonoid and total  
549 isothiocyanate content of two broccoli cultivars (*Brassica oleraceae* var *italica*) following the  
550 application of a commercial brown seaweed extract (*Ascophyllum nodosum*). *Agricultural and Food*  
551 *Science*. 2014; 23(1): 28–37.
- 552 31. Kurilich A, Juvik J. Quantification of carotenoid and tocopherol antioxi- dants in *Zea mays*. *J Agric*  
553 *Food Chem*. 1999; 47:1948-1955.
- 554 32. Kaur R, Arora S, Thukral AK. Quantitative and qualitative analysis of saponins in different plant parts  
555 of *Chlorophytum borivialum*. *Int J Pharm Bio Sci* 2015; 6(1), 826 – 835.
- 556 33. Biradar SR, Rachetti, BD. Extraction of Some Secondary Metabolites & Thin Layer Chromatography  
557 from Different Parts of *Centella Asiatica* L. (URB). *American Journal of Life Sciences*. 2013;1(6):243.
- 558 34. Moon JK, Shibamoto T. Antioxidant Assays for Plant and Food Components. *J. Agric. Food Chem*  
559 2009; 57: 1655–1666.
- 560 35. Benzie IF, Strain JJ. The ferric reducing ability of plasma (FRAP) as measurement of “antioxidant  
561 power”: the FRAP assay. *Anal Biochem*. 1996; 239: 70–76.
- 562 36. Chao HC, Najjaa H, Villareal MO, Ksouri R, Han J, Neffati M, Isoda H. *Arthrophytum scoparium*  
563 inhibits melanogenesis through the down-regulation of tyrosinase and melanogenic gene expressions  
564 in B16 melanoma cells. *Experimental Dermatology*. 2013; 22: 131–136.
- 565 37. Sakat SS. In vitro antioxidant and anti-inflammatory activity of methanol extract of *Oxalis corniculata*  
566 *linn*. *International Journal of Pharmacy and Pharmaceutical Sciences* 2010;2(1):82–87.

- 567 38. Khadri A, Neffati M, Smiti S, Falè P, Lino ARL, Serralheiro MLM, Araújo MEM. Antioxidant,  
568 antiacetylcholinesterase and antimicrobial activities of *Cymbopogon schoenanthus* L. Spreng (lemon  
569 grass) from Tunisia. LWT - Food Science and Technology. 2010;43(2):331–336.
- 570 39. Abdoul-Azize S. Potential Benefits of Jujube (*Zizyphus Lotus* L.) Bioactive Compounds for Nutrition  
571 and Health. Journal of Nutrition and Metabolism. 2016. <http://dx.doi.org/10.1155/2016/2867470>
- 572 40. Akrouf A, Gonzalez LA, El Jani H, Madrid PC. Antioxidant and antitumor activities of *Artemisia*  
573 *campestris* and *Thymelaea hirsuta* from southern Tunisia. Food and Chemical Toxicology.  
574 2011;49(2):342–347.
- 575 41. Itidel C, Chokri M, Mohamed B, Yosr Z. Antioxidant activity, total phenolic and flavonoid content  
576 variation among Tunisian natural populations of *Rhus tripartita* (Ucria) Grande and *Rhus pentaphylla*  
577 Desf. Industrial Crops and Products. 2013; 51: 171–177.
- 578 42. Alghazeer, Hussein El-Saltani , Nabeel Saleh , Asma Al-Najjar , Fatma Hebail. Antioxidant and  
579 antimicrobial properties of five medicinal Libyan plants extracts Rabia. Natural Science. 2012; 4: 324-  
580 335.
- 581 43. Sung B, Chung HY, Kim ND. Role of Apigenin in Cancer Prevention via the Induction of Apoptosis  
582 and Autophagy. Journal of Cancer Prevention. 2016: 21(4), 216–226.  
583 <http://doi.org/10.1109/DEIV.2006.357424>
- 584 44. Perk AA, Shatynska-mytsyk I, Gerçek YC, Boztas K, Yazgan M, Fayyaz S, Farooqi AA. Rutin  
585 mediated targeting of signalling machinery in cancer cells. Cancer Cell International. 2014; 14(1), 1–  
586 5.
- 587 45. Fan FY, Sang LX, Jiang M, McPhee DJ. Catechins and their therapeutic benefits to inflammatory  
588 bowel disease. Molecules. 2017; 22(3).
- 589 46. Mamta S, Amita K, Eshita M. Micropropagation and Phytochemical Profile Analysis Of Tissue  
590 Culture Grown *Plantago Ovata* Forsk. Asian J Pharm Clin Res. 2017;10 (4):202-206.
- 591 47. Ohtera A, Miyamae Y, Nakai N. Identification of 6-octadecynoic acid from a methanol extract of  
592 *Marrubium vulgare* L. as a peroxisome proliferator-activated receptor gamma agonist. Biochem  
593 Biophys Res Commun 2013;440(2):204–209.

- 594 48. Nargund LV, Redd GR, Hariprasad V. Inhibition of albumin denaturation and anti-inflammatory  
595 activity of acetamido [(phenyl-4'-yl)-oxymethyl)]2-(p-substituted phenylamino)-1,2,4-triazoles and -  
596 1,3,4-thiadiazoles. *Indian J Exp Biol.* 1993;31(4):395-6.
- 597 49. Saso L, Valentini G, Casini ML, Grippa E, Gatto MT, Leone MG, Silvestrini B. Inhibition of heat-  
598 induced denaturation of albumin by nonsteroidal antiinflammatory Drugs (NSAIDs): pharmacological  
599 implications. *Arch Pharmacol Res.* 2001; 24: 150–158
- 600 50. Chatterjee P, Chandra S, Dey P, Bhattacharya S. Evaluation of anti-inflammatory effects of green tea  
601 and black tea: a comparative in vitro study. *J Adv Pharm Technol Res.* 2012; 3: 136–138.
- 602 51. García-Ayllón M-S, Small DH, Avila J, Sáez-Valero J. Revisiting the Role of Acetylcholinesterase in  
603 Alzheimer's Disease: Cross-Talk with P-tau and  $\beta$ -Amyloid. *Frontiers in Molecular Neuroscience.*  
604 2011; 4:22. doi: [10.3389/fnmol.2011.00022]
- 605 52. Fawole OA, Amoo SO, Ndhkala AR, Light ME, Finnie JF, Van Staden J. Anti-inflammatory,  
606 anticholinesterase, antioxidant and phytochemical properties of medicinal plants used for pain-related  
607 ailments in South Africa. *J. Ethnopharmacol.* 2010; 127: 235–241
- 608 53. Hernandez MF, Falé PLV, Araújo MEM, Serralheiro MLM. Acetylcholinesterase inhibition and  
609 antioxidant activity of the water extracts of several *Hypericum* species. *Food Chem.* 2010; 120: 1076–  
610 1082.
- 611 54. Orhan IE, Belhatab R, Şenol FS, Gülpınar AR, Hoşbaş S, Kartal M. Profiling of cholinesterase  
612 inhibitory and antioxidant activities of *Artemisia absinthium*, *A. herba-alba*, *A. fragrans*, *Marrubium*  
613 *vulgare*, *M. astranicum*, *Origanum vulgare* subsp. *glandulosum* and essential oil analysis of two  
614 *Artemisia* species. *Industrial Crops and Products.* 2010; 32(3): 566–571.
- 615 55. Loizzo MR, Tundis R, Conforti F, Menichini F, Bonesi M, Nadjafi F, Giuseppe Frega N, Menichini  
616 F. *Salvia leriifolia* Benth (Lamiaceae) extract demonstrates in vitro antioxidant properties and  
617 cholinesterase inhibitory activity. *Nutr. Res.* 2010; 30: 823–83.
- 618 56. Adewusi EA, Moodley N, Steenkamp V. Antioxidant and acetylcholinesterase inhibitory activity of  
619 selected southern African medicinal plants. *S. Afr. J. Bot.* 2011; 77:638–644





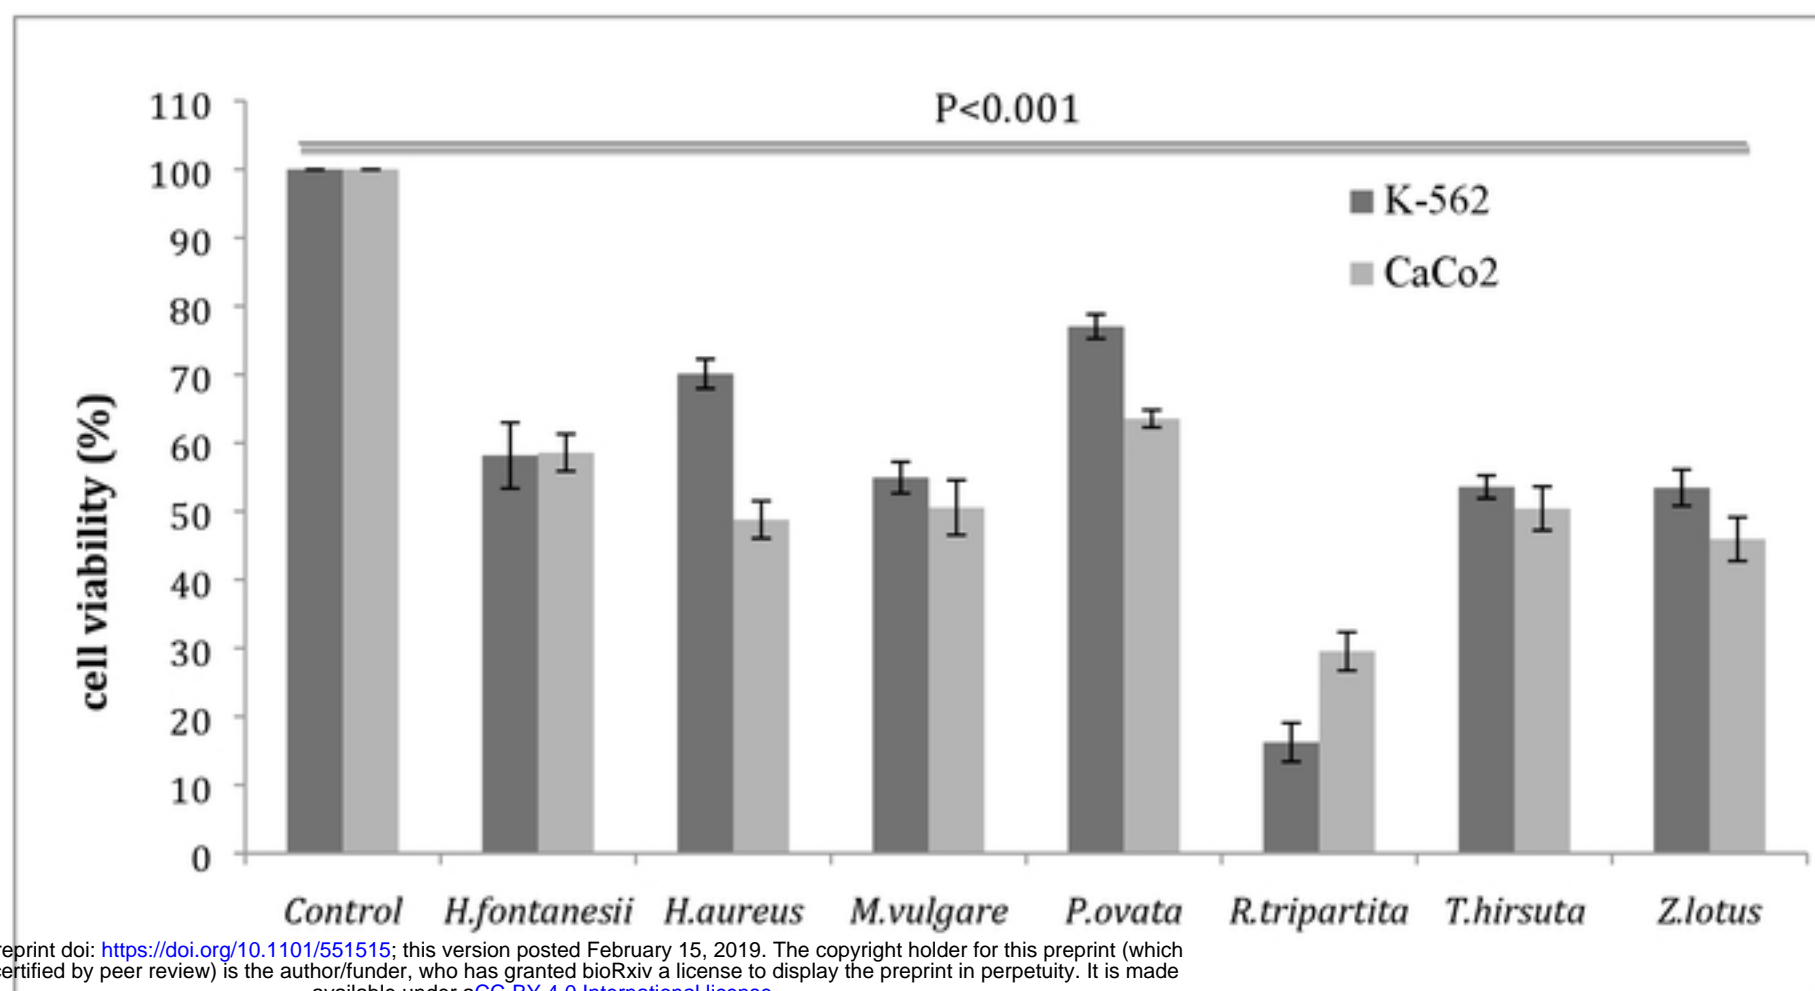

**Figure 1.** Anti-proliferative activities of the different ethanol extracts (100 µg/ml) of Tunisian medicinal plants tested on two neoplastic cell lines (K-562 and CaCo-2).

Data are presented as mean values ± standard deviation (n=3). Statistical analysis: unpaired STUDENT T-test. The results were statistically significant compared with the untreated cells (control) (p < 0.001).

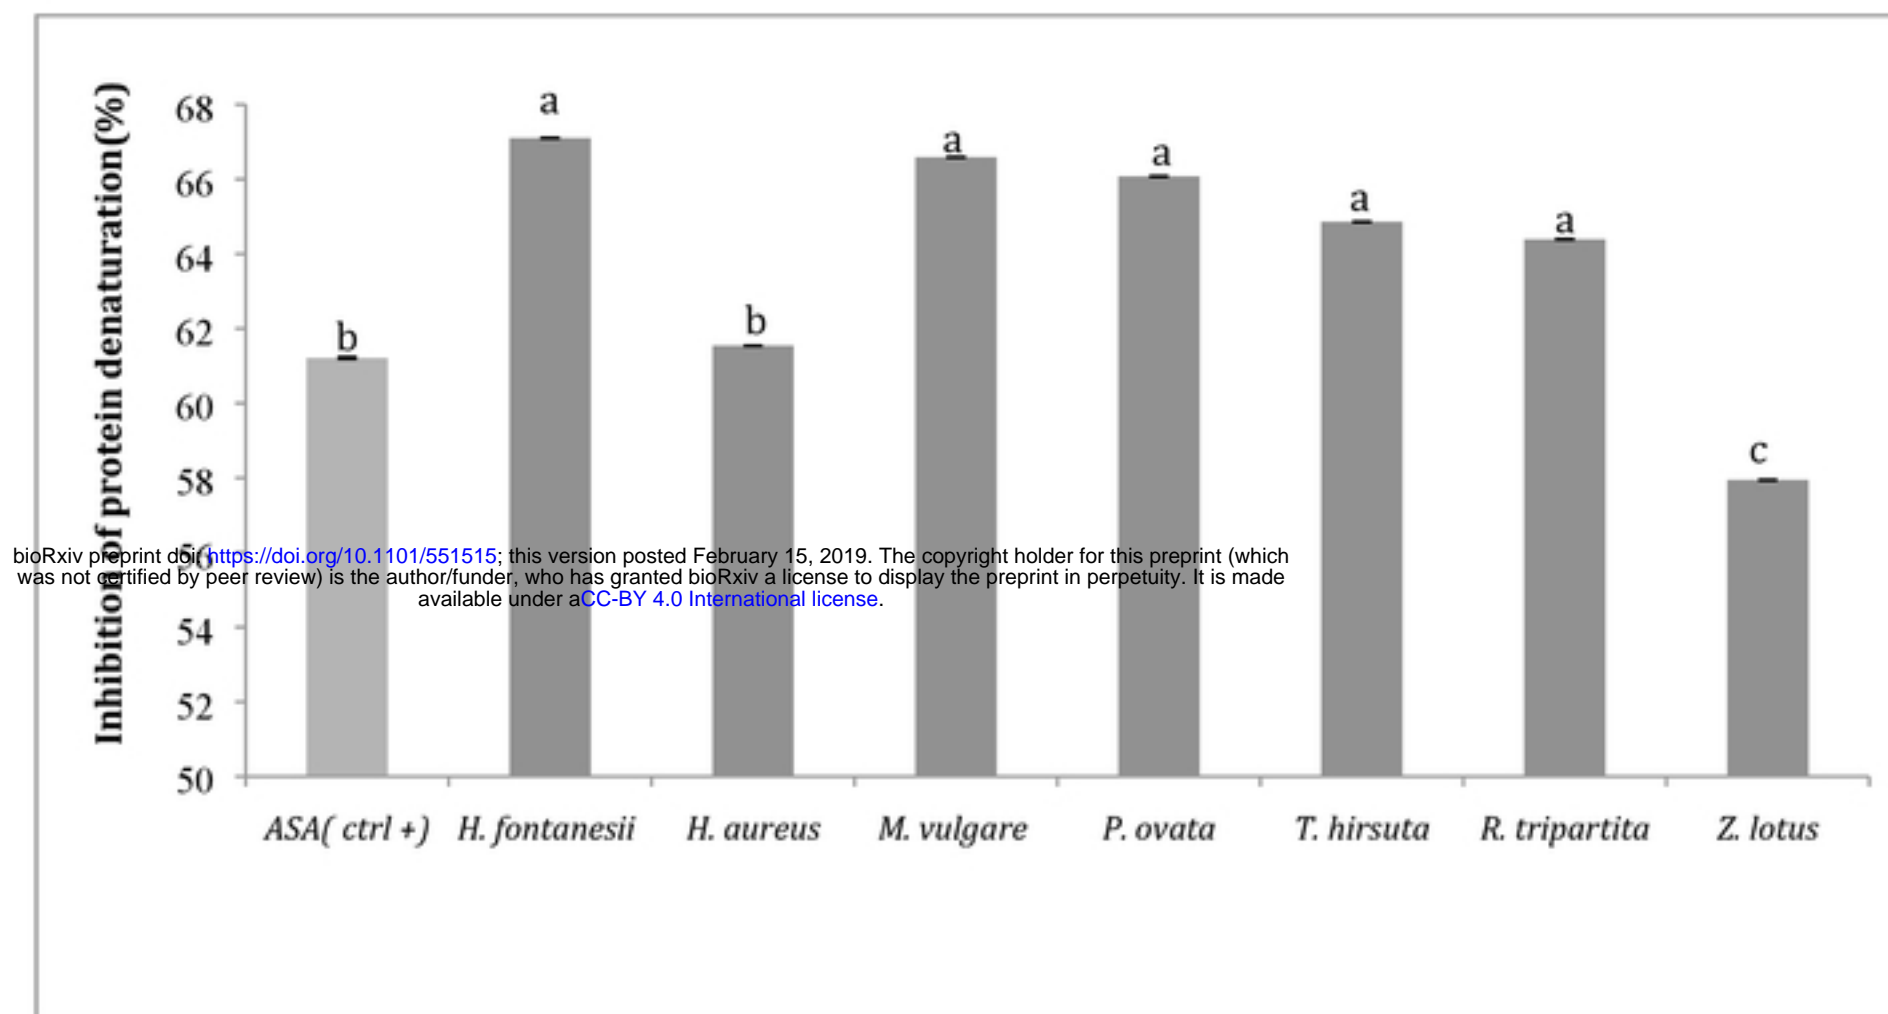

ASA: acetylsalicylic acid

Figure 2. Anti-inflammatory activity of the different methanolic extracts (100 µg/ml) of tested Tunisian medicinal plants. Data are presented as mean values ± standard deviation (n=3). Statistical analysis: ANOVA test and DUNCAN test.

<sup>a,b,c</sup> Different letters above the bars indicate significant differences (p<0.05).

bioRxiv preprint doi: <https://doi.org/10.1101/551515>; this version posted February 15, 2019. The copyright holder for this preprint (which was not certified by peer review) is the author/funder, who has granted bioRxiv a license to display the preprint in perpetuity. It is made available under aCC-BY 4.0 International license.

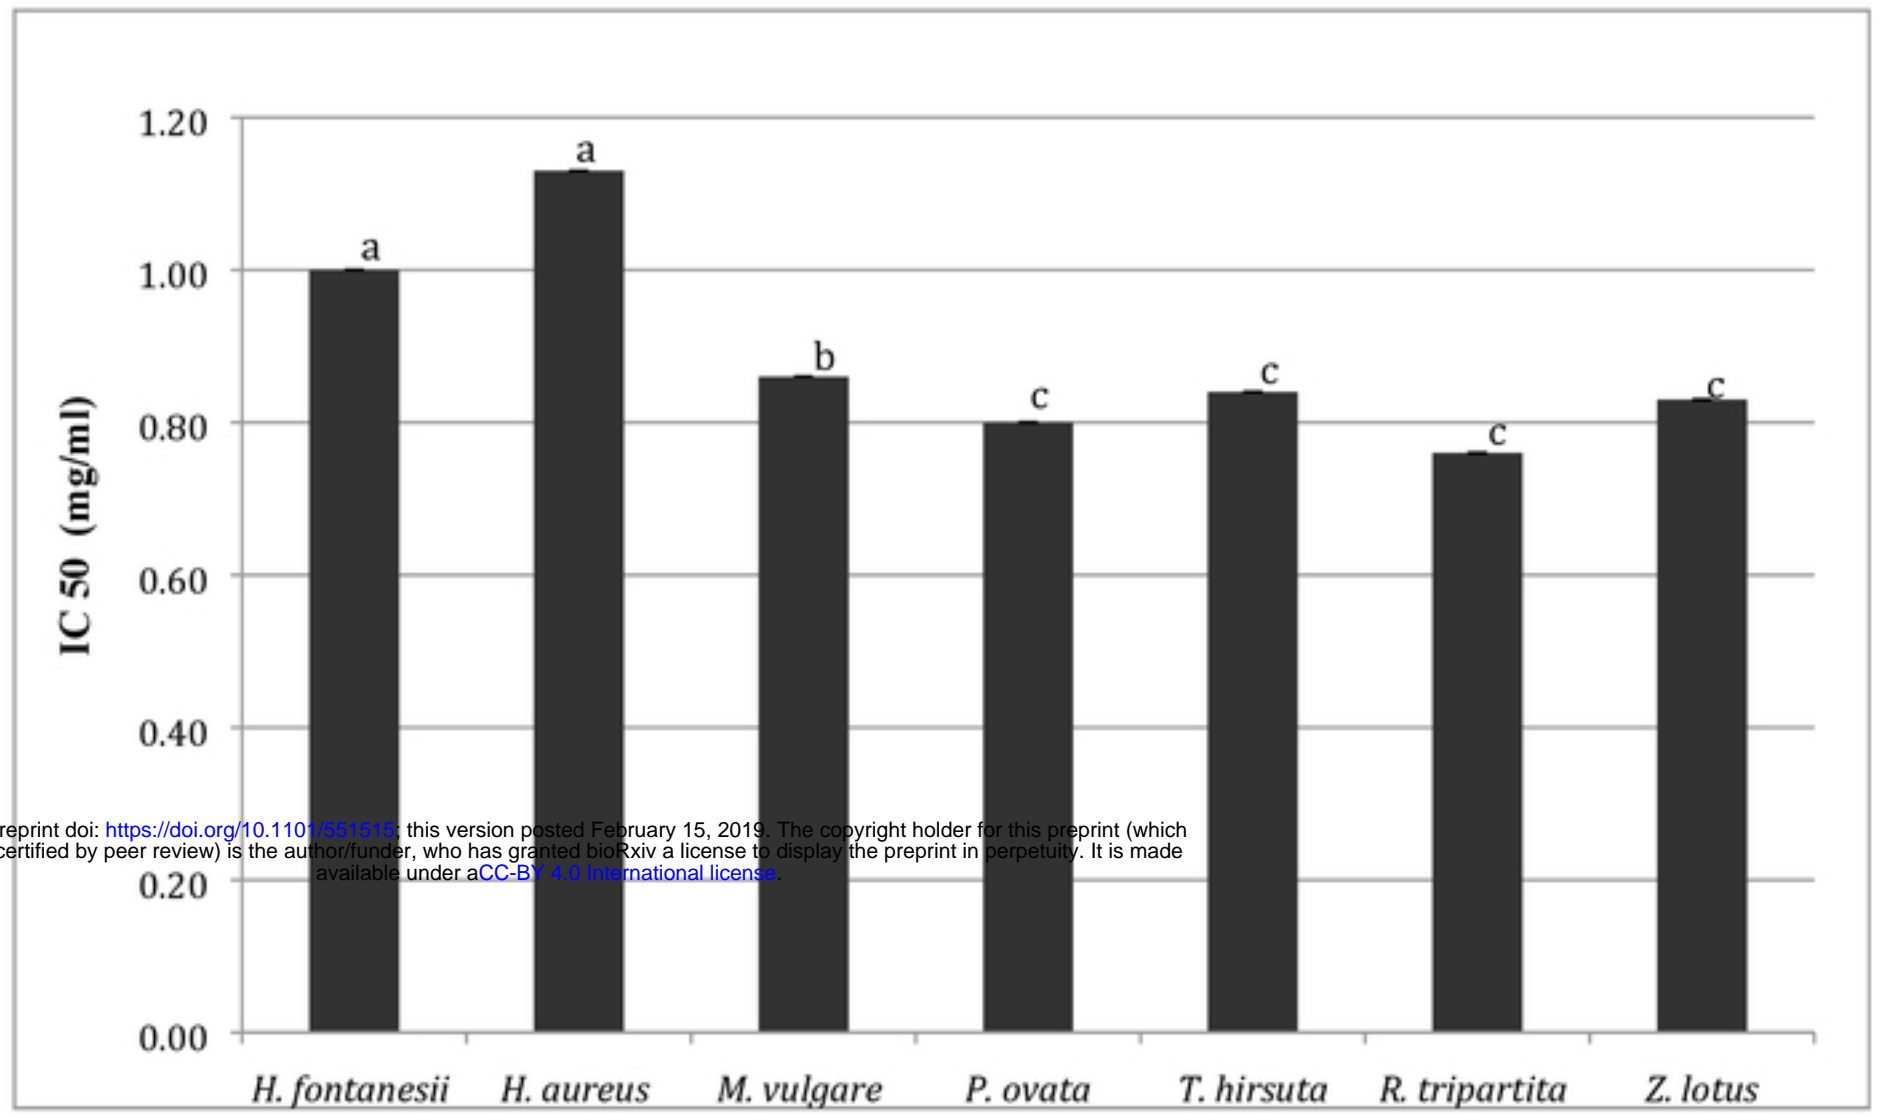

Figure 3. Acetylcholinesterase activity inhibition of ethanol extracts of the tested Tunisian medicinal plants. Data are presented as mean values  $\pm$  standard deviation (n=3). Statistical analysis: ANOVA test and DUNCAN test. <sup>a,b,c</sup> Different letters above the bars indicate significant differences (p<0.05).
